# Supplementary material
Source: publisher figshare collection journal article supplement (https://karger.figshare.com/articles/dataset/_/3510318)
Supplement: Supplementary file 1 [file 1]

**Web-Table 4.** The association of pain interference level (none vs. mild vs. moderate-severe) with obesity, Log\_CRP level, and pain intensity in men: Models of ordinal logistic regression adjusting for ethnicity, age, and education.

| Pain Interference            |         |               |       |         |               |       |           |               |       |           |               |       |
|------------------------------|---------|---------------|-------|---------|---------------|-------|-----------|---------------|-------|-----------|---------------|-------|
| Variables                    | Model 7 |               |       | Model 8 |               |       | Model 9   |               |       | Model 10  |               |       |
|                              | OR      | 95% CI        | P     | OR      | 95% CI        | P     | OR        | 95% CI        | P     | OR        | 95% CI        | P     |
| Men                          |         |               |       |         |               |       |           |               |       |           |               |       |
| Ethnicity <sup>†</sup>       | 1.16    | 0.52-2.60     | 0.72  | 1.18    | 0.53-2.66     | 0.67  | 1.15      | 0.51-2.59     | 0.73  | 1.18      | 0.52-2.66     | 0.69  |
| Age                          | 0.97    | 0.91-1.03     | 0.35  | 0.97    | 0.92-1.03     | 0.33  | 0.97      | 0.92-1.04     | 0.36  | 0.97      | 0.91-1.03     | 0.34  |
| Education (Years)            | 1.02    | 0.93-1.11     | 0.74  | 1.02    | 0.93-1.12     | 0.76  | 1.02      | 0.93-1.12     | 0.74  | 1.02      | 0.93-1.11     | 0.77  |
| hsCRP Level                  | ----    | -----         | ----- | 0.89    | 0.68-1.16     | 0.40  | -----     | -----         | ----- | 0.89      | 0.69-1.16     | 0.40  |
| BMI:                         |         |               |       |         |               |       |           |               |       |           |               |       |
| Normal weight (18.5-24.9)    | -----   | -----         | ----- | -----   | -----         | ----- | Reference |               |       | Reference |               |       |
| Overweight (25-29.9)         | -----   | -----         | ----- | -----   | -----         | ----- | 0.98      | 0.47-2.06     | 0.96  | 0.99      | 0.47-2.07     | 0.97  |
| Obese and Morbid Obese (≥30) | -----   | -----         | ----- | -----   | -----         | ----- | 1.02      | 0.43-2.43     | 0.97  | 1.04      | 0.43-2.49     | 0.92  |
| Pain Intensity-Mild          | 63.60   | 8.46-478.01   | <0.01 | 63.56   | 8.45-477.97   | <0.01 | 63.74     | 8.47-479.60   | <0.01 | 63.75     | 8.47-479.86   | <0.01 |
| Pain Intensity-Severe        | 164.36  | 21.48-1257.65 | <0.01 | 167.36  | 21.84-1282.23 | <0.01 | 164.55    | 21.50-1259.28 | <0.01 | 167.67    | 21.88-1284.79 | <0.01 |
