# Supplementary material
Source: publisher figshare collection journal article supplement (https://karger.figshare.com/articles/dataset/_/3510318)
Supplement: Supplementary file 2 [file 1]

**Web-Table 3.** Association of pain interference level (none vs. mild vs. moderate-severe) with hsCRP and obesity in men: Models of ordinal logistic regression adjusting for ethnicity, age, and education.

| Pain Interference            |      |                   |       |           |                   |       |           |                   |      |
|------------------------------|------|-------------------|-------|-----------|-------------------|-------|-----------|-------------------|------|
| Variables                    | OR   | Model 4<br>95% CI | P     | OR        | Model 5<br>95% CI | P     | OR        | Model 6<br>95% CI | P    |
| <b>Men</b>                   |      |                   |       |           |                   |       |           |                   |      |
| Ethnicity <sup>†</sup>       | 0.99 | 0.50-1.95         | 0.97  | 0.99      | 0.50-1.95         | 0.97  | 0.99      | 0.50-1.97         | 0.98 |
| Age                          | 0.96 | 0.91-1.01         | 0.11  | 0.96      | 0.91-1.01         | 0.11  | 0.96      | 0.91-1.01         | 0.11 |
| Education (Years)            | 1.02 | 0.94-1.10         | 0.66  | 1.02      | 0.94-1.10         | 0.64  | 1.02      | 0.94-1.10         | 0.67 |
| log_CRP Level                | 0.94 | 0.75-1.19         | 0.61  | -----     | -----             | ----- | 0.94      | 0.75-1.19         | 0.62 |
| BMI:                         |      |                   |       |           |                   |       |           |                   |      |
| Normal weight (18.5-24.9)    | ---- | -----             | ----- | Reference |                   |       | Reference |                   |      |
| Overweight (25-29.9)         | ---- | -----             | ----- | 1.01      | 0.53-1.91         | 0.98  | 1.02      | 0.54-1.94         | 0.95 |
| Obese and Morbid Obese (≥30) | ---- | -----             | ----- | 0.91      | 0.43-1.94         | 0.81  | 0.93      | 0.44-1.98         | 0.85 |

<sup>†</sup>Ethnicity is considered as all non-white participants versus white participants.
