# Supplementary material
Source: publisher figshare collection journal article supplement (https://karger.figshare.com/articles/dataset/_/3510318)
Supplement: Supplementary file 3 [file 1]

**Web-Table 1.** Number of participants in each BMI group stratified by gender.

| BMI Categories     |           | Gender |       |
|--------------------|-----------|--------|-------|
|                    |           | Men    | Women |
| Normal             | 18.5-24.9 | N.     | N.    |
|                    |           | 74     | 139   |
| Overweight         | 25-29.9   | 123    | 144   |
| Obese/Morbid-Obese | ≥30       | 60     | 127   |
| Total              |           | 257    | 410   |
