# Supplementary material
Source: publisher figshare collection journal article supplement (https://karger.figshare.com/articles/dataset/_/3510318)
Supplement: Supplementary file 5 [file 1]

**Web-Table 2.** Association of pain intensity level (none vs. mild vs. moderate-severe) with hsCRP and obesity in men: Models of ordinal logistic regression adjusting for ethnicity, age, and education.

| Pain Intensity                       |         |           |      |           |           |       |           |           |      |
|--------------------------------------|---------|-----------|------|-----------|-----------|-------|-----------|-----------|------|
| Variables                            | Model 1 |           |      | Model 2   |           |       | Model 3   |           |      |
|                                      | OR      | 95% CI    | P    | OR        | 95% CI    | P     | OR        | 95% CI    | P    |
| <b>Men</b>                           |         |           |      |           |           |       |           |           |      |
| Ethnicity <sup>†</sup>               | 0.71    | 0.39-1.29 | 0.26 | 0.73      | 0.40-1.34 | 0.31  | 0.73      | 0.40-1.34 | 0.31 |
| Age                                  | 0.97    | 0.93-1.01 | 0.11 | 0.96      | 0.92-1.00 | 0.07  | 0.96      | 0.92-1.00 | 0.08 |
| Education (Years)                    | 1.01    | 0.94-1.08 | 0.81 | 1.01      | 0.94-1.08 | 0.85  | 1.01      | 0.94-1.08 | 0.84 |
| hsCRP Level                          | 1.01    | 0.83-1.23 | 0.89 | -----     | -----     | ----- | 1.01      | 0.83-1.24 | 0.88 |
| BMI:                                 |         |           |      |           |           |       |           |           |      |
| Normal weight (18.5-24.9)            | ----    | -----     | ---- | Reference |           |       | Reference |           |      |
| Overweight (25-29.9)                 | ----    | -----     | ---- | 1.05      | 0.61-1.83 | 0.86  | 1.05      | 0.60-1.82 | 0.87 |
| Obese and Morbid Obese ( $\geq 30$ ) | ----    | -----     | ---- | 0.70      | 0.36-1.37 | 0.29  | 0.69      | 0.35-1.36 | 0.29 |

<sup>†</sup>Ethnicity is considered as all non-white participants versus white participants.
